# Supplementary material for: A comprehensive FTIR micro-spectroscopic analysis and classification of precancerous human oral tissue aided by machine learning
Source: Royal Society of Chemistry journal article supplement (doi:10.1039/d4sd00122b), 2024-01-01
Supplement: d4sd00122b1.pdf [file d4sd00122b1.pdf]

**A comprehensive FTIR micro-spectroscopic analysis and classification of precancerous human oral tissue aided by Machine Learning**

**Supplementary Information**

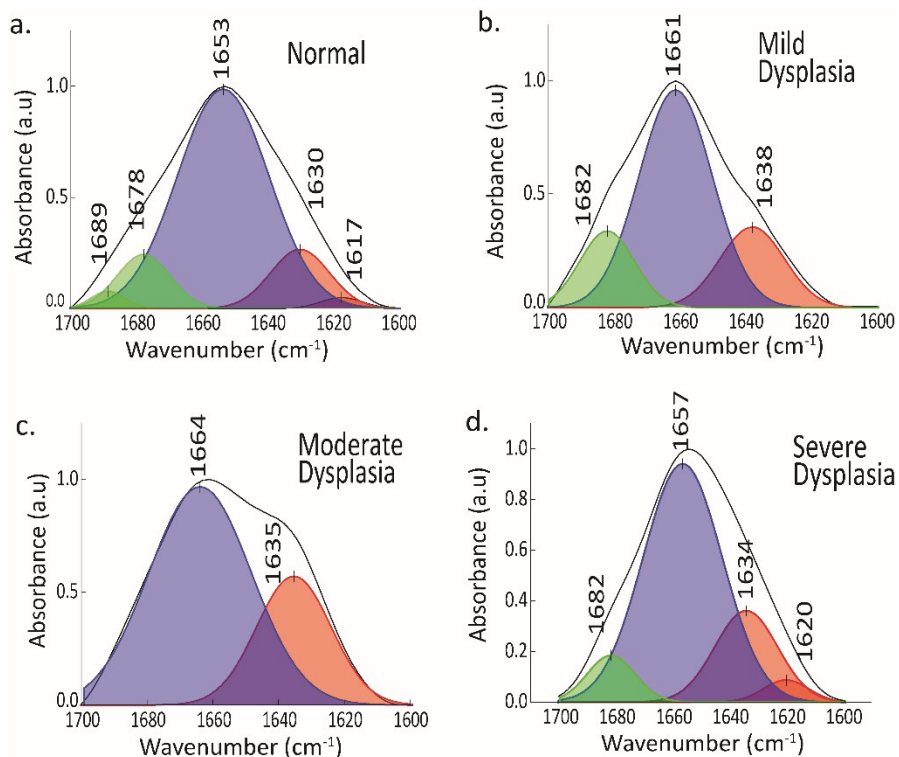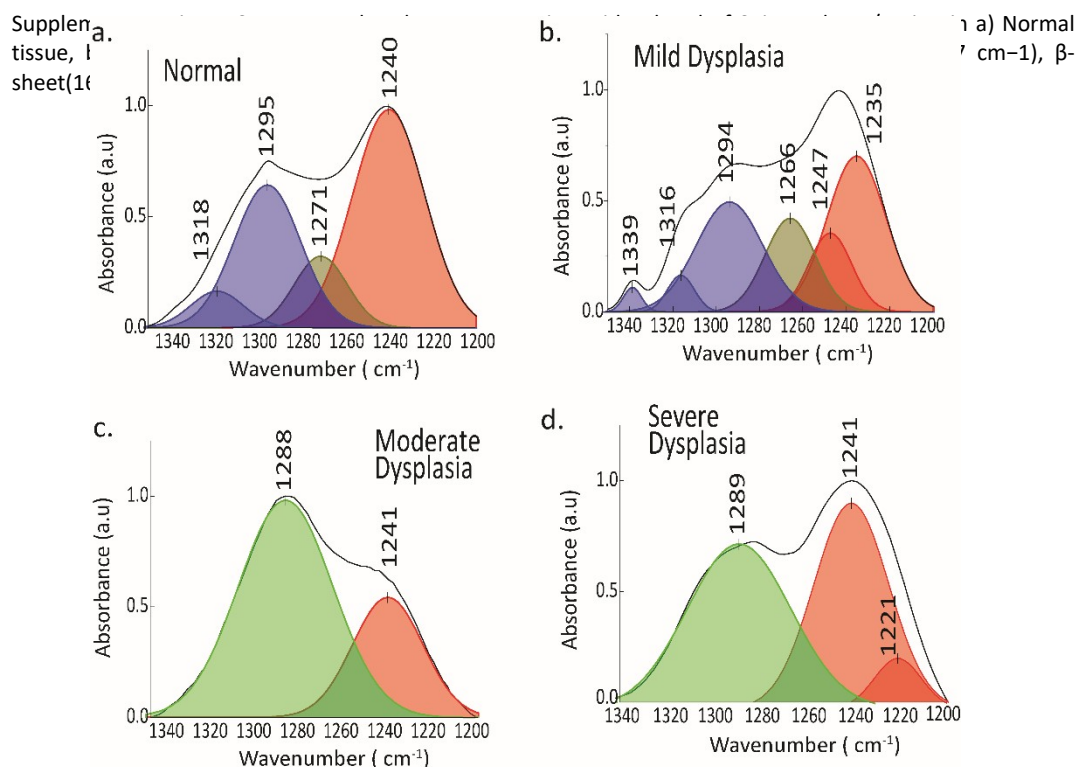

Supplementary Figure S2: Deconvoluted FTIR spectra in amide III band of spinous layer/region in a) Normal tissue, b) Mild dysplasia, c) Moderate dysplasia and d) Severe dysplasia.  $1300 \pm 5$  ( $\alpha$ -helix),  $1288 \pm 2$  ( $\beta$ -turn),  $1240 \pm 2$  ( $\beta$ -sheet) and random coil ( $1270 \pm 5$ )

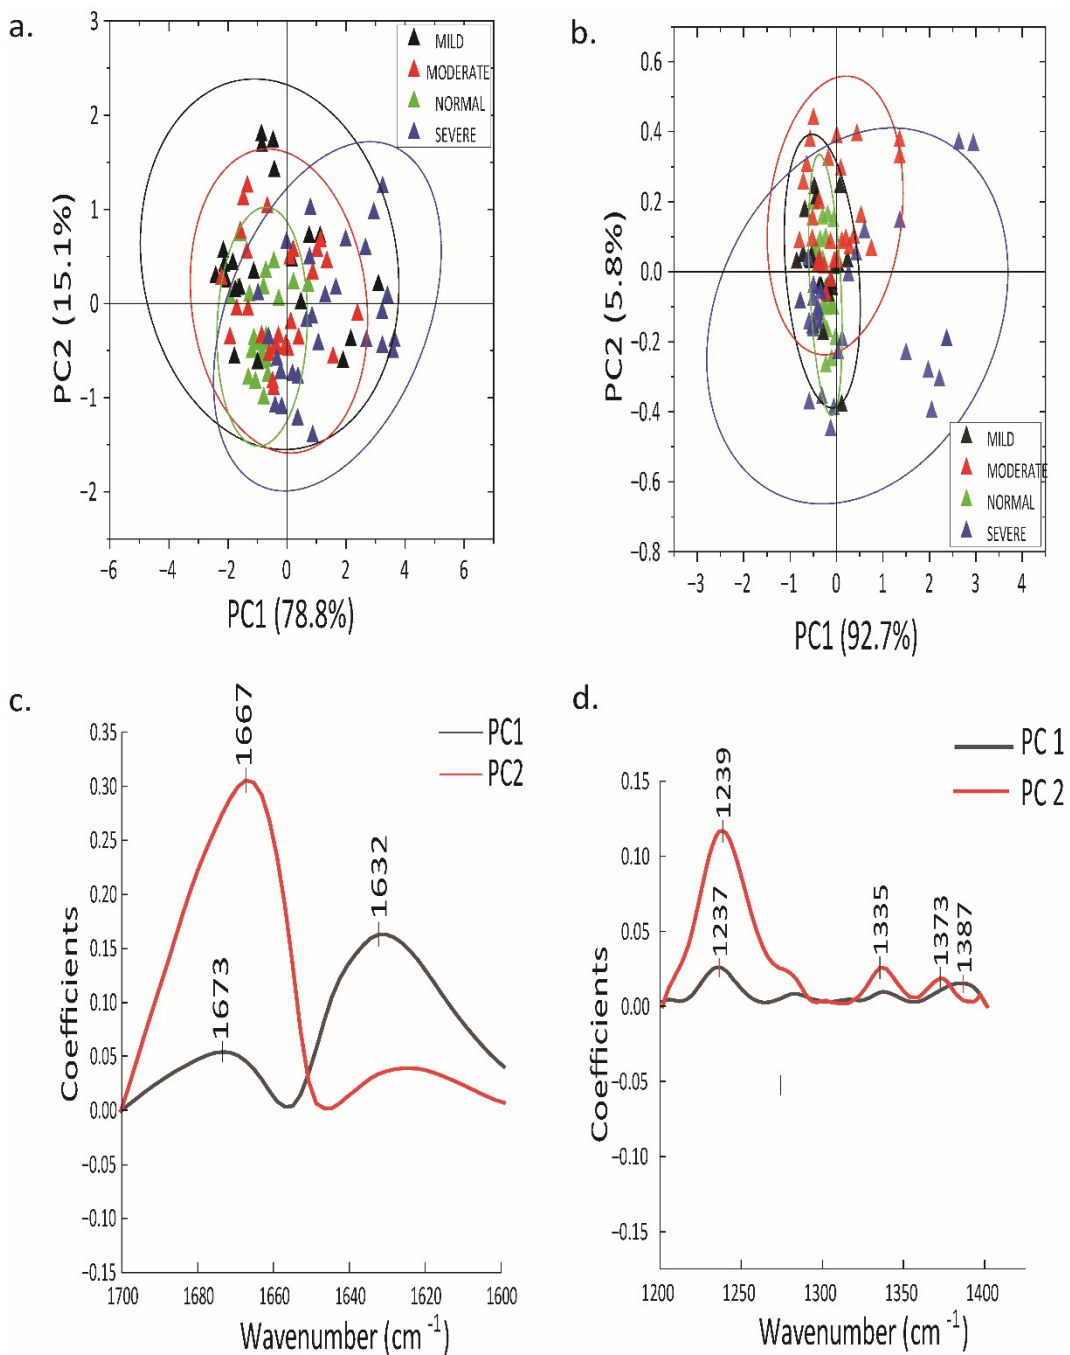

Supplementary Figure S3: a) PCA score plot in Amide I region, b) PCA score plot in Amide III region, c) Loading plot in Amide I region and d) Loading Plot in Amide III region.

| Parameter                      | Mild dysplasia               | Moderate dysplasia          | Severe dysplasia            |
|--------------------------------|------------------------------|-----------------------------|-----------------------------|
| Age (Years)                    | 55±10<br>21 Male<br>3 Female | 52±5<br>31 Male<br>3 Female | 53±5<br>35 Male<br>2 Female |
| Habit                          |                              |                             |                             |
| Smoking                        | 17 Male                      | 23 Male                     | 30 Male                     |
| Smoking with smokeless tobacco | 4 Male                       | 8 Male                      | 5 Male                      |
| Smokeless tobacco              | 3 Female                     | 3 Female                    | 2 Female                    |

**Predictive Model**

|                  |                 | Normal            | Mild                | Moderate            | Severe             |
|------------------|-----------------|-------------------|---------------------|---------------------|--------------------|
| LDA              | <b>Normal</b>   | 24 Samples (100%) | 0 (0%)              | 0 (0%)              | 0 (0%)             |
|                  | <b>Mild</b>     | 1 samples (4.55%) | 19 samples (86.36%) | 1 samples(4.55%)    | 1 samples (4.55%)  |
|                  | <b>Moderate</b> | 0 (0%)            | 1 samples (3.4%)    | 28 samples (93.10%) | 0(0%)              |
|                  | <b>Severe</b>   | 0 (0%)            | 0 (0%)              | 4 samples (13.3%)   | 26 samples (86.6%) |
| Cross-validation | <b>Normal</b>   | 24 samples (100%) | 0 (4.1%)            | 0 (0%)              | 0 (0%)             |
|                  | <b>Mild</b>     | 2 samples (9.09%) | 17 samples (77.2%)  | 3 samples (13.6%)   | 0 samples (4.5%)   |
|                  | <b>Moderate</b> | 0 (0%)            | 1 samples (3.4%)    | 28 samples (96.5%)  | 0 (0%)             |
|                  | <b>Severe</b>   | 0 (0%)            | 1 samples (6.2%)    | 1 samples (6.2%)    | 14 samples (87.5%) |

Supplementary Table S1: Clinicopathological characteristics of the study groups.

Supplementary Table S2: PCA-LDA classification in 1700 – 1600 cm<sup>-1</sup> region

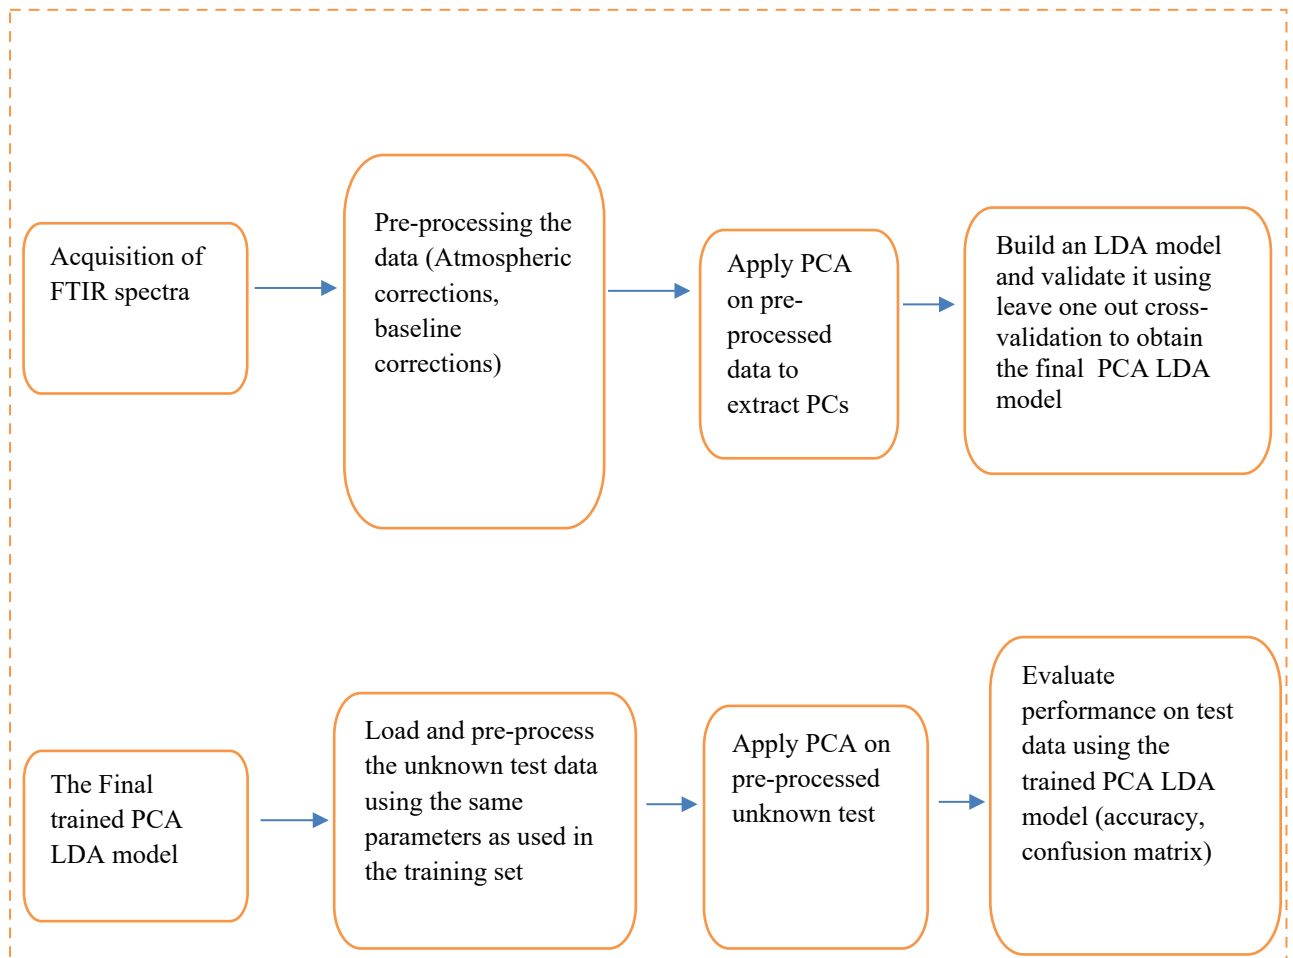

Supplementary Figure S4: Training model of the external data set

Initially, a trained PCA LDA model was built and validated using leave-one-out-cross-validation. Then, an unknown dataset was acquired from FTIR analysis of 20 samples which was not involved in the model development (Normal = 5, Mild dysplasia = 5, Moderate dysplasia = 5, and Severe dysplasia = 5), and the same pre-processing steps were applied to it as used for the training data. Next, the trained PCA-LDA model was used to classify the test data. In the amide I region the accuracy achieved was 80%, whereas in the amide III region, the accuracy achieved is around 90%.

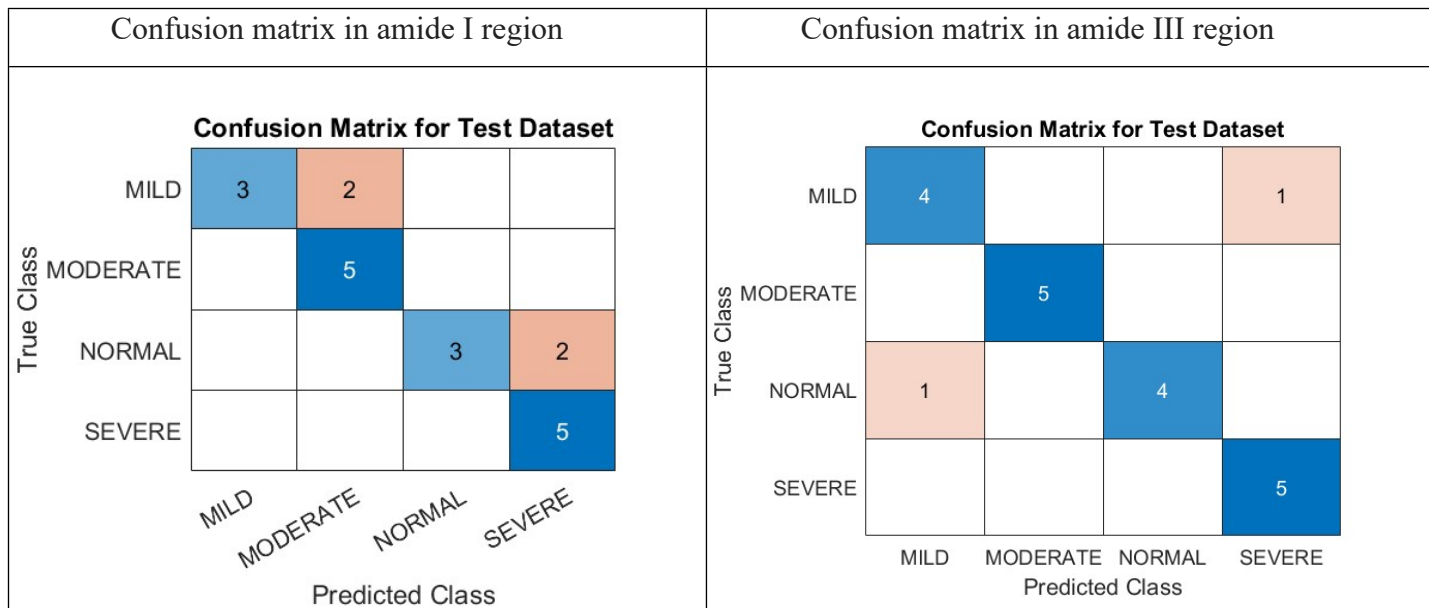

Supplementary Figure S5: Confusion Matrix based on the above training model for both Amide I and Amide III regions.
